# Supplementary material for: Glycosylation of the primary binding pocket of a subtilisin protease causes a remarkable broadening in stereospecificity in peptide synthesis
Source: Royal Society of Chemistry journal article supplement (doi:10.1039/b010021h), 2001-01-01
Supplement: b010021h.doc [file b010021h.doc]

# Supporting Information for Katsutzugu et al

### General Experimental

1H and 13C NMR spectra were measured on a Varian Unity 400 (400 MHz for 1H and 100 MHz for 13C) spectrometer with DMSO-d6 as internal standard. High resolution mass spectra (HRMS) were recorded using Micromass ZAB-SE (FAB+). Optical rotations were measured with a Perkin-Elmer 243B polarimeter. ALUGRAM® SIL G/UV254 Art.-Nr. 818 133 (Macherey-Nagel) was used for analytical TLC. Preparative TLC was performed on a pre-coated Silica gel plate Art.5744 (Merck) visualized with UV light. WT-subtilisin *Bacillus lentus* and mutant enzymes were purified and prepared as reported previously.[[1]](#endnote-2) Protected acids were purchased from Sigma or Bachem and were used as received. All solvents were reagent grade and distilled prior to use.

General procedure for peptide coupling

To a solution of Z-L-PheOBn (**1**, 19.2 mg, 0.05 mmol) in DMF (0.25 mL) and water (0.144 mL), glycinamide hydrochloride (**7**, 17 mg, 0.15 mmol) and Et3N (0.15 mmol, 0.0625 mL) were added, followed by addition of S166C-S-**a**, 0.106 mL, 0.5 mg of active enzyme in MES buffer (10 mM MES, 1 mM CaCl2, pH 5.8)]. The reaction was stirred for 1 h at room temperature. The mixture was diluted with EtOAc and washed with 1 M KHSO4 (1 mL  1) and brine (1 mL  1), and the organic layer was dried over MgSO4. After evaporation, the residue was purified by preparative TLC (CH2Cl2 / MeOH = 90 / 10) to afford Z-L-PheGlyNH2 (**9**, 16.9 mg, 95%).

Peptide ligations of other substrates using other enzymes were carried out following the same procedure except for the reaction time. In the case of D-amino acids as acyl donors, 0.5 mg more active enzyme was added to the reaction vessel after 24 h, and then the mixture was stirred for another 24 h.

### Experimental Data

**Z-L-PheGlyNH2 (9):** 1H NMR (DMSO-d6)  2.74 (dd, *J* = 11.0, 14.0 Hz, 1H, C*H2*Ph), 3.04 (dd, *J* = 4.0, 14.0 Hz, 1H, C*H2*Ph), 3.59 - 3.72 (m, 2H, NHC*H2*CO), 4.21 - 4.35 (m, 1H, NHC*H*CO), 4.93 (d, *J* = 12.5 Hz, 1H, OC*H2*Ph), 4.94 (d, *J* = 12.5 Hz, 1H), OC*H2*Ph), 7.12 (brs, 2H, NH), 7.16 - 7.38 (m, 5H, Ph), 7.60 (d, *J* = 8.5 Hz, 1H, NH), 8.27 (t, *J* = 5.5 Hz, 1H, NH) ; 13C NMR (DMSO-d6)37.3, 42.0, 56.3, 65.3, 126.3, 127.5, 127.8, 128.1, 128.4, 129.3, 137.0, 138.2, 156.0, 170.8, 171.8; HRMS (FAB+)calcd for C19H22N3O4 (M + H)+ 356.1610, found 356.1639; []21D = 3.94 (c 1.04, MeOH).

**Z-L-AlaGlyNH2 (10):**1H NMR (DMSO-d6) 1.20 (d, *J* = 7.0 Hz, 3H, CH3), 3.60 (dd, *J* = 5.5, 16.0 Hz, 1H, C*H2*NH), 3.62 (dd, *J* = 5.5, 16.0 Hz, 1H, C*H2*NH), 4.03 (dq, *J* = 7.0, 7.0 Hz, 1H, CH3C*H*NH), 5.00 (d, *J* = 12.5 Hz, 1H, OC*H2*Ph), 5.03 (d, *J* = 12.5 Hz, 1H, OC*H2*Ph), 7.11 (brs, 1H, NH2), 7.18 (brs, 1H, NH2), 7.27 - 7.42 (m, 5H, Ph), 7.57 (d, *J* = 7.0 Hz, 1H, NH), 8.11 (t, *J* = 5.5 Hz, 1H, NH); 13C NMR (DMSO-d6)17.9, 42.0, 50.3, 65.5, 127.85, 127.89, 128.4, 136.9, 155.9, 170.9, 172.7; HRMS (FAB+)calcd for C13H18N3O4 (M + H)+ 280.1297, found 280.1307; []25D = 8.44 (c 0.64, MeOH).

**Z-L-GluGlyNH2 (11):** 1H NMR (DMSO-d6)  1.66 - 1.79 (m, 1H, C*H2*CH2COOH), 1.83 - 1.95 (m, 1H, C*H2*CH2COOH), 2.26 (t, *J* = 7.5 Hz, 2H, C*H2*COOH), 3.62 (d, *J* = 5.5 Hz, 2H, NHC*H2*CO), 3.95 - 4.05 (m, 1H, NHC*H*CO), 5.01 (d, *J* = 12.5 Hz, 1H, OC*H2*Ph), 5.03 (d, *J* = 12.5 Hz, 1H, OC*H2*Ph), 7.07 (brs, 1H, NH), 7.20 (brs, 1H, NH), 7.25 - 7.40 (m, 5H, Ph), 7.55 (d, *J* = 7.5 Hz, 1H, NH), 8.11 (t, *J* = 5.5 Hz, 1H, NH); 12.20 (brs, 1H, COOH); 13C NMR (DMSO-d6) 27.0, 30.2, 41.9, 54.1, 65.6, 127.8, 127.9, 128.4, 136.9, 156.2, 170.8, 171.7, 174.0; HRMS (FAB+)calcd for C15H20N3O6 (M + H)+ 338.1352, found 338.1364; []25D = 9.28 (c 0.69, MeOH).

**Z-D-PheGlyNH2 (12):**1H and 13C NMR spectral data are identical to **9**. HRMS calcd for C19H22N3O4 (M + H)+ 356.1610, found 356.1592; []21D = +3.42 (c 1.17, MeOH).

**Z-D-AlaGlyNH2 (13):**1H and 13C NMR spectral data are identical to **10**. HRMS calcd for C13H18N3O4 (M + H)+ 280.1297, found 280.1303; []24D = +8.49 (c 0.86, MeOH).

**Z-D-GluGlyNH2 (14):**1H and 13C NMR spectral data are identical to **11**. HRMS calcd for C15H20N3O6 (M + H)+ 338.1352, found 338.1353 ; []24D = +9.07 (c 1.08, MeOH).

**Z-L-Phe-L-AlaNH2 (15):**1H NMR (DMSO-d6)  1.22 (d, *J* = 7.0 Hz, 3H, CH3), 2.71 (dd, *J* = 13.5, 13.5 Hz, 1H, C*H2*Ph), 3.03 (dd, *J* = 3.5, 13.5 Hz, 1H, C*H2*Ph), 4.18 - 4.31 (m, 2H, NHC*H*CO  2), 4.93 (s, 2H, OC*H2*Ph), 7.04 (brs, 1H, NH), 7.14 - 7.22 (m, 1H, NH), 7.55 (d, *J* = 8.5 Hz, 1H, NH), 8.08 (d, *J* = 7.5 Hz, 1H, NH); 13C NMR (DMSO-d6)18.5, 37.4, 48.1, 56.2, 65.2, 126.3, 127.4, 127.7, 128.1, 128.4, 129.3, 137.1, 138.2, 155.9, 171.1, 174.1; HRMS (FAB+)calcd for C20H24N3O4 (M + H)+ 370.1767, found 370.1769; []24D = 8.86 (c 0.44, MeOH).

**Z-L-Ala-L-AlaNH2 (16):**1H NMR (DMSO-d6)  1.19 (d, *J* = 7.0 Hz, 3H, CH3), 1.24 (d, *J* = 7.5 Hz, 3H, CH3), 3.90 - 4.26 (m, 2H, NHC*H*CO  2), 5.01 (s, 2H, C*H2*OPh), 7.02 (brs, 1H, NH), 7.13 (brs, 1H, NH), 7.25 - 7.45 (m, 5H, Ph), 7.51 (d, *J* = 6.5 Hz, 1H, NH), 7.88 (d, *J* = 7.5 Hz, 1H, NH); 13C NMR (DMSO-d6)18.1, 18.5, 47.9, 50.2, 65.4, 127.78, 127.84, 128.4, 137.1, 155.8, 172.0, 174.2; HRMS (FAB+)calcd for C14H20N3O4 (M + H)+ 294.1454, found 294.1457; []21D = 20.4 (c 0.77, MeOH).

**Z-L-Glu-L-AlaNH2 (17):**1H NMR (DMSO-d6)  1.20 (d, *J* = 8.0 Hz, 3H, CH3), 1.68 - 1.82 (m, 1H, C*H2*CH2COOH), 1.82 - 2.03 (m, 1H, C*H2*CH2COOH), 2.21 - 2.40 (m, 2H, CH2C*H2*COOH), 3.93 - 4.25 (m, 2H, NHC*H*CO  2), 5.02 (s, 2H, OC*H2*Ph), 7.02 (brs, 1H, NH), 7.18 - 7.46 (m, 5H, Ph), 7.54 (dd, *J* = 7.5, 24.0 Hz, 2H, NH2), 7.92 (d, *J* = 7.5 Hz, 1H, NH), 12.40 (brs, 1H, COOH); 13C NMR (DMSO-d6)18.4, 26.2, 30.3, 48.0, 53.1, 65.4, 127.0, 127.7, 127.8, 127.9, 128.4, 129.3, 137.0, 156.2, 173.7, 173.8, 174.1; HRMS (FAB+)calcd for C16H22N3O6 (M + H)+ 352.1509, found 352.1502; []25D = 16.7 (c 0.76, MeOH).

1. . M.R. Stabile, W.G. Lai, G. DeSantis, M. Gold and J.B. Jones, C. Mitchinson, R.R. Bott, T.P. Graycar and C.-C. Liu, *Bioorg. Med. Chem. Lett.* 1996, **6**, 2501. [↑](#endnote-ref-2)
